# Supplementary material for: The United States and Western Europe - Frictions among friends. Speech by Roland de Kergorlay, Head of the Delegation of the Commission of the European Community, at Lotos Club. New York, 10 February 1982
Source: Royal Society of Chemistry journal article supplement (doi:10.1039/b701462g), 1982-01-01
Supplement: b701462g.pdf [file b701462g.pdf]

## Electronic Supplementary Information

### Structure elucidation of C<sub>80</sub>, C<sub>81</sub> and C<sub>82</sub> isoprenoid tetraacids responsible for naphthenate deposition in crude oil production

*Bjart F. Lutnaes, Jostein Krane, Ben E. Smith and Steven J. Rowland*

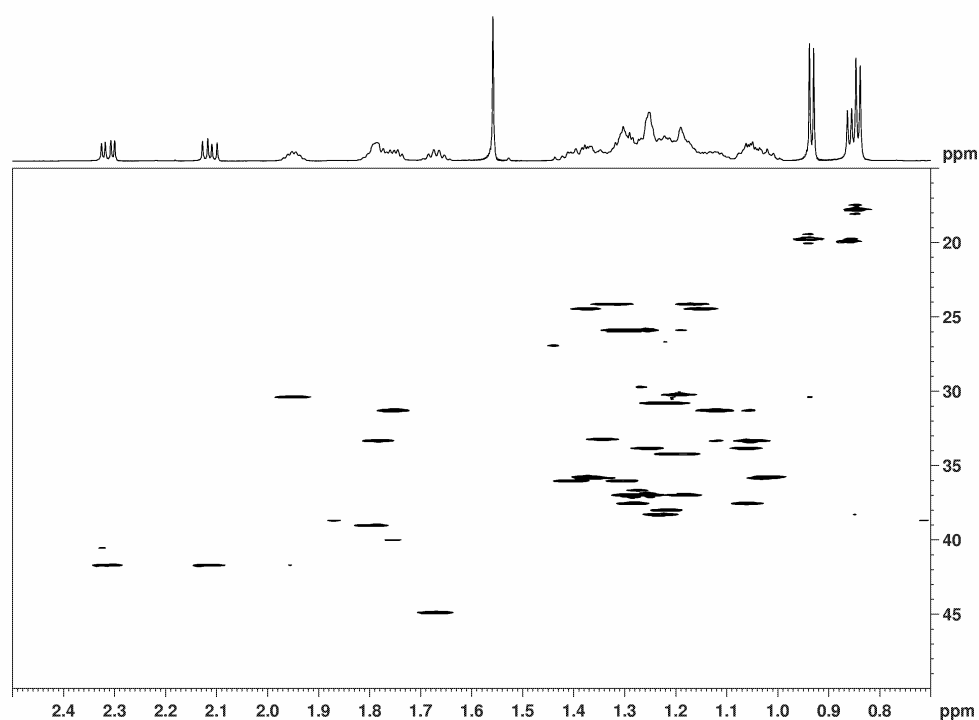

**Fig. 1.** HSQC spectrum (800 MHz, 298 K, CDCl<sub>3</sub>) of the tetracyclic tetraacid (**3**).

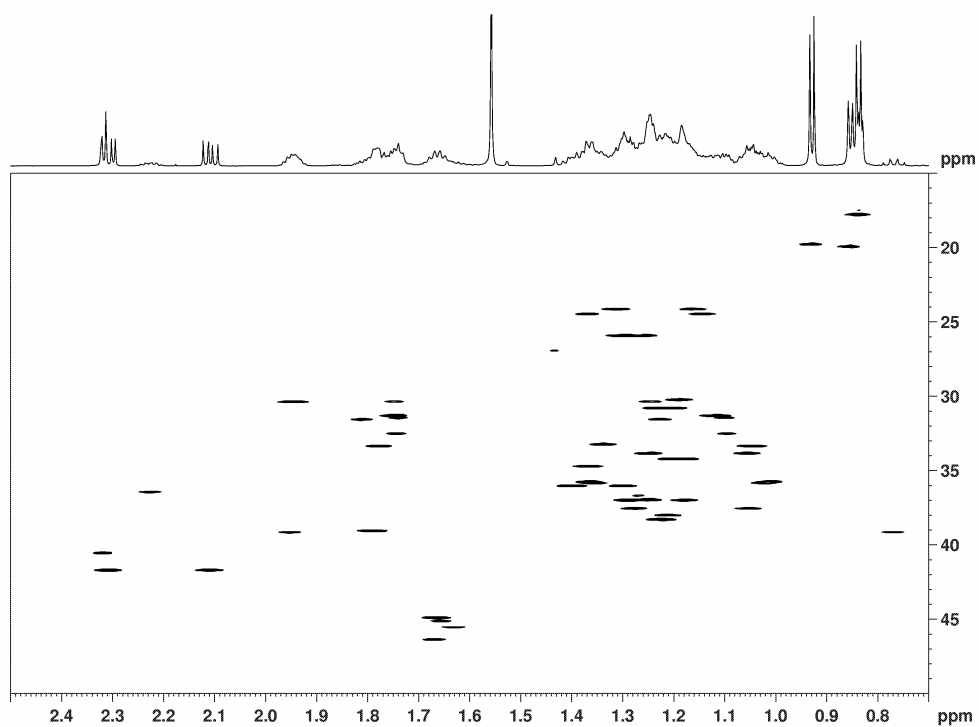

**Fig. 2.** HSQC spectrum (800 MHz, 298 K, CDCl<sub>3</sub>) of the pentacyclic tetraacid present as two regioisomers (structures not given).

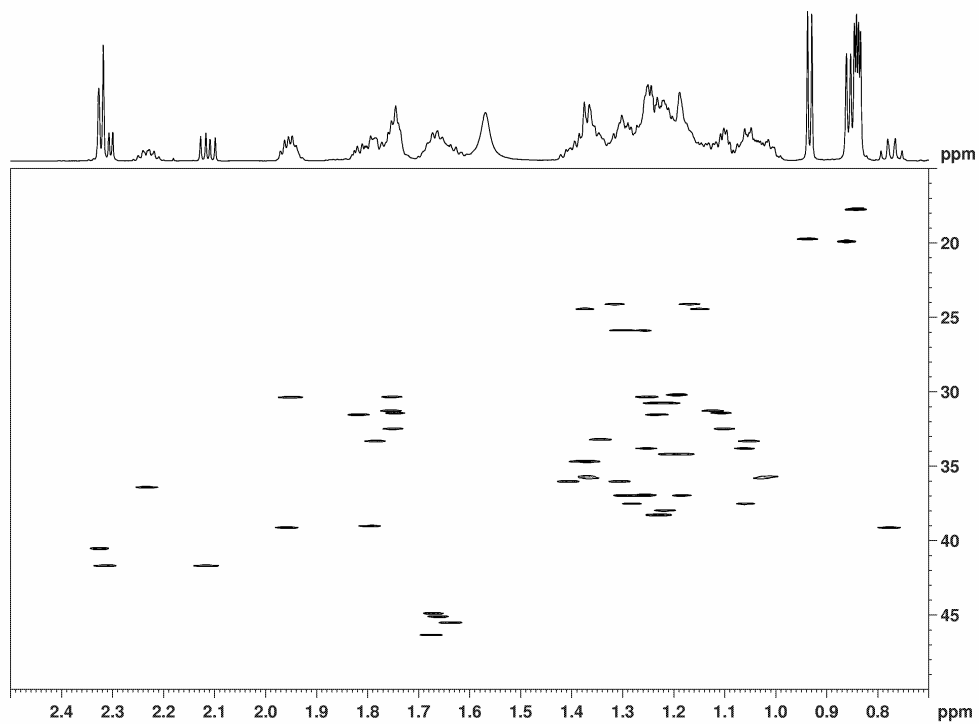

**Fig. 3.** HSQC spectrum (800 MHz, 298 K, CDCl<sub>3</sub>) of the hexacyclic tetraacid (**2**, **5-7**), present as four regioisomers.

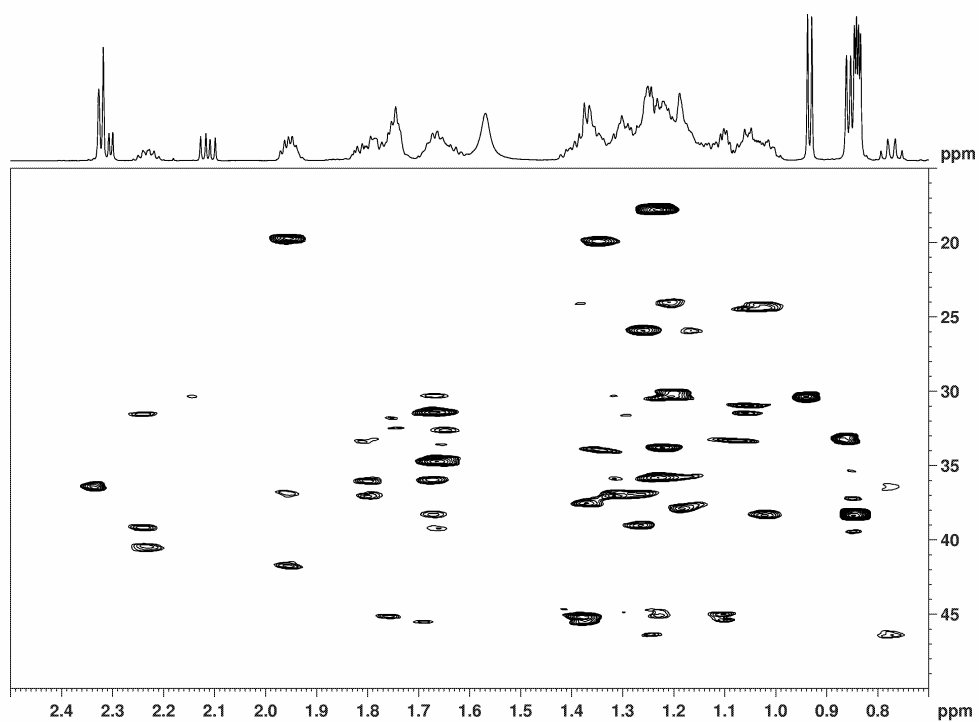

**Fig. 4.** H2BC spectrum (600 MHz, 298 K,  $\text{CDCl}_3$ ) of the tetracyclic tetraacid (**2**, **5-7**).

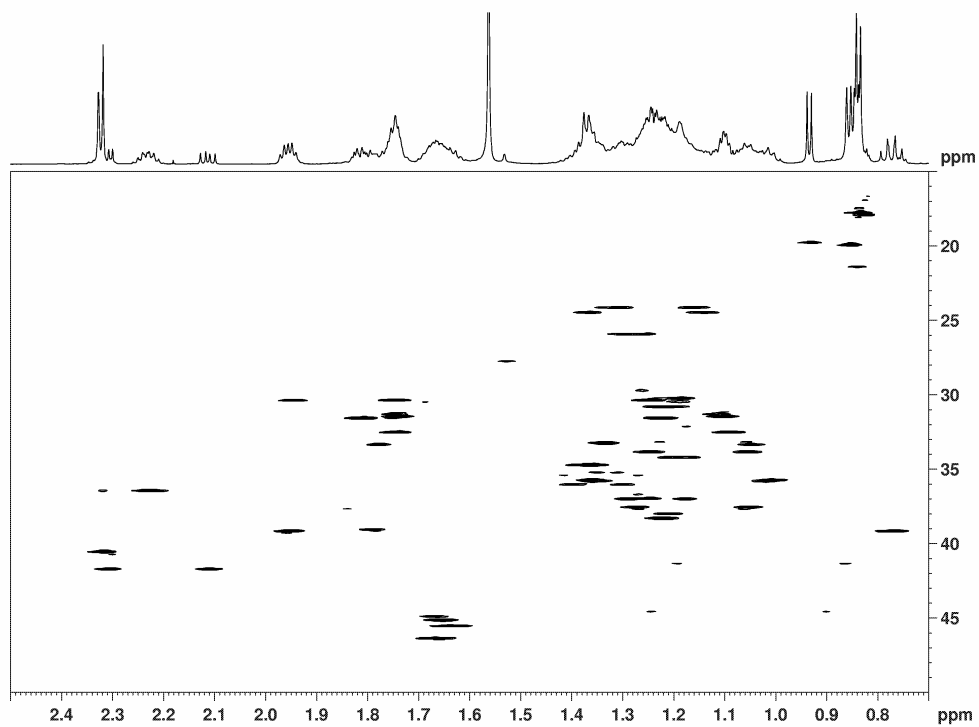

**Fig. 5.** HSQC spectrum (800 MHz, 298 K,  $\text{CDCl}_3$ ) of the mixture of  $\text{C}_{80}$ ,  $\text{C}_{81}$  and  $\text{C}_{82}$  heptacyclic tetraacids (structures not given). Regioisomers are possible.

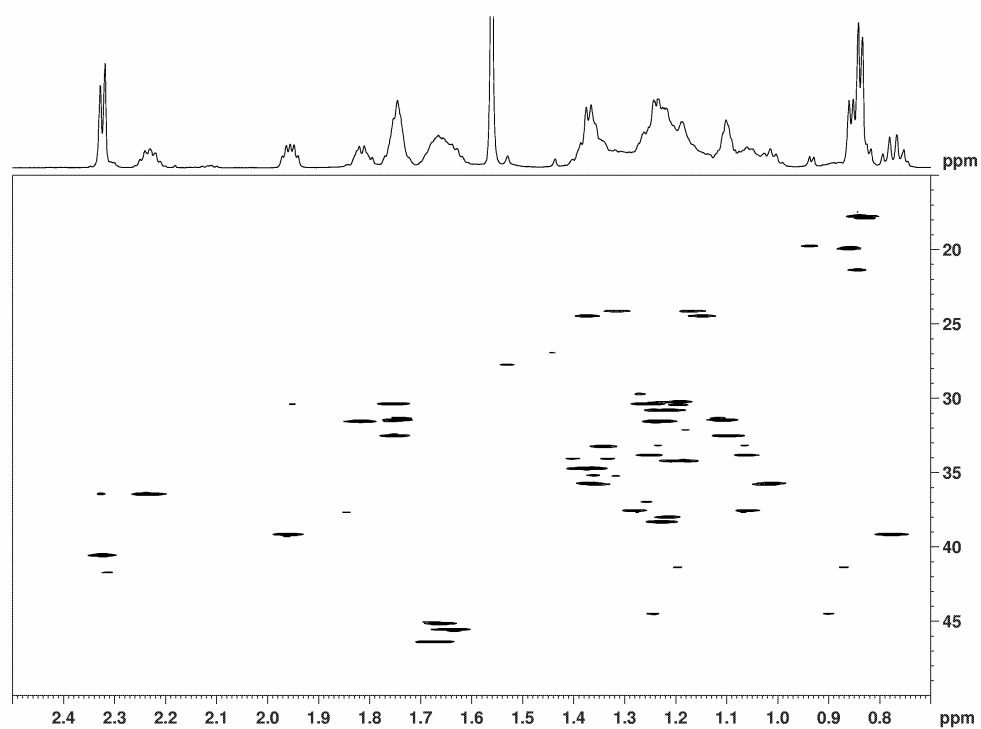

**Fig. 6.** HSQC spectrum (800 MHz, 298 K,  $\text{CDCl}_3$ ) of the mixture of  $\text{C}_{80}$ ,  $\text{C}_{81}$  and  $\text{C}_{82}$  octacyclic tetraacids (**4**, **8**, **9**).

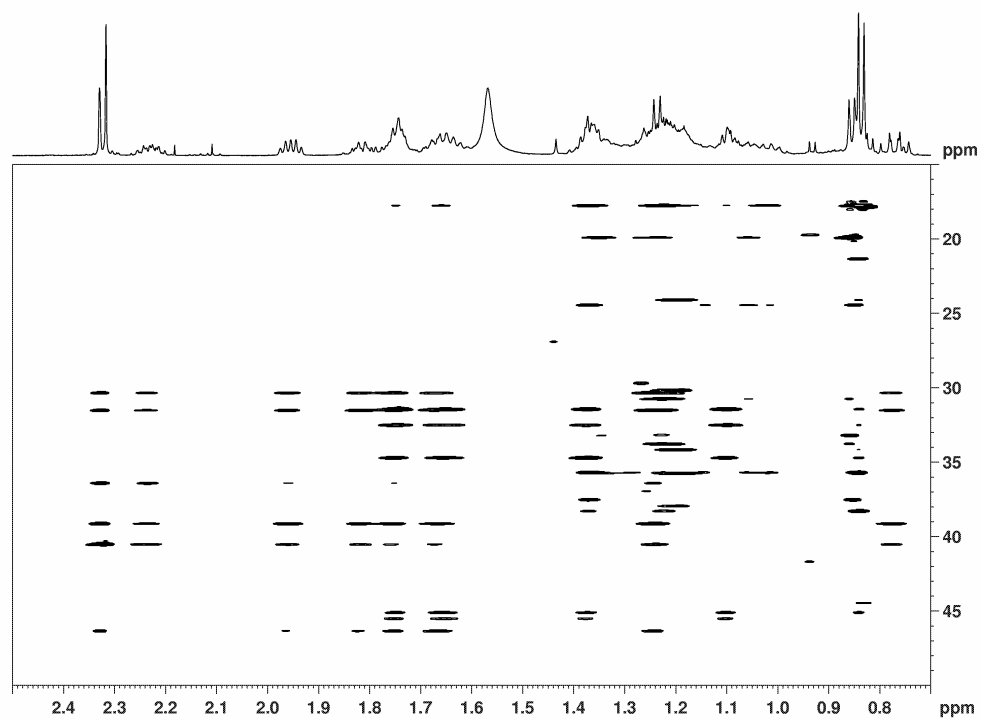

**Fig. 7.** 2D TOCSY-HSQC spectrum (600 MHz, 298 K,  $\text{CDCl}_3$ ) of mixture of  $\text{C}_{80}$ ,  $\text{C}_{81}$  and  $\text{C}_{82}$  octacyclic tetraacids (**4**, **8**, **9**).

24#1-20 RT: 0.05-0.98 AV: 20 NL: 1.46E7  
T: + c ms [ 150.00-2000.00]

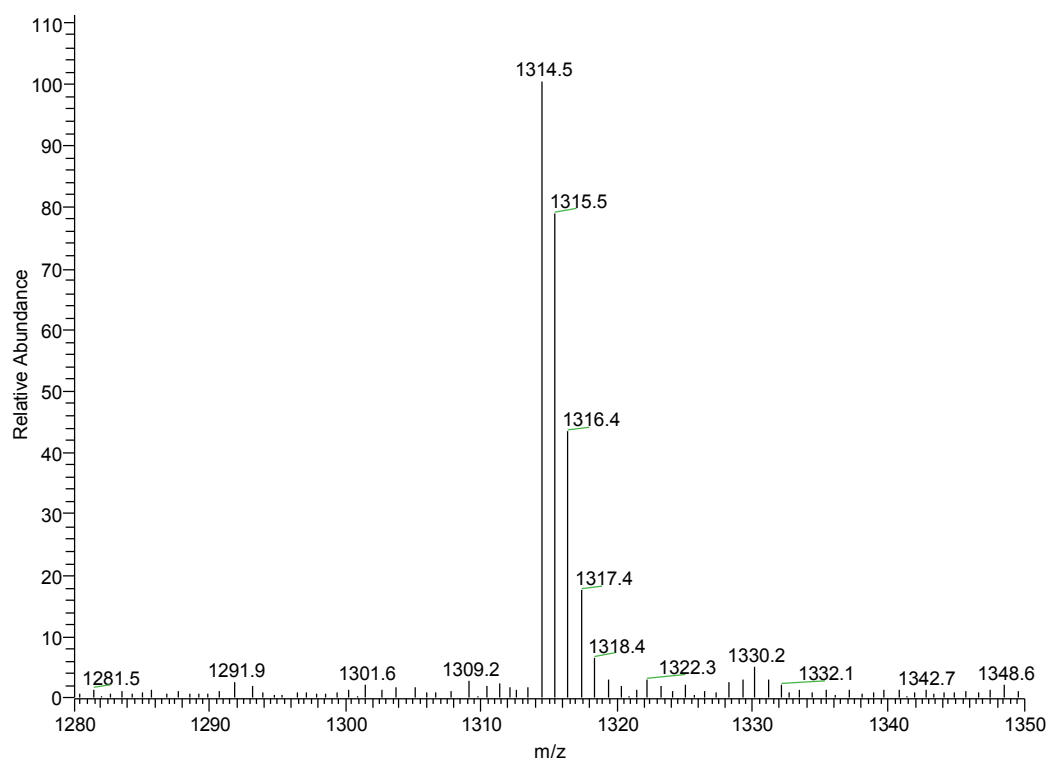

**Fig. 8.** ESI MS spectrum of the tetracyclic tetraacid (3).

26#1-21 RT: 0.02-1.00 AV: 21 NL: 1.34E7  
T: + c ms [ 150.00-2000.00]

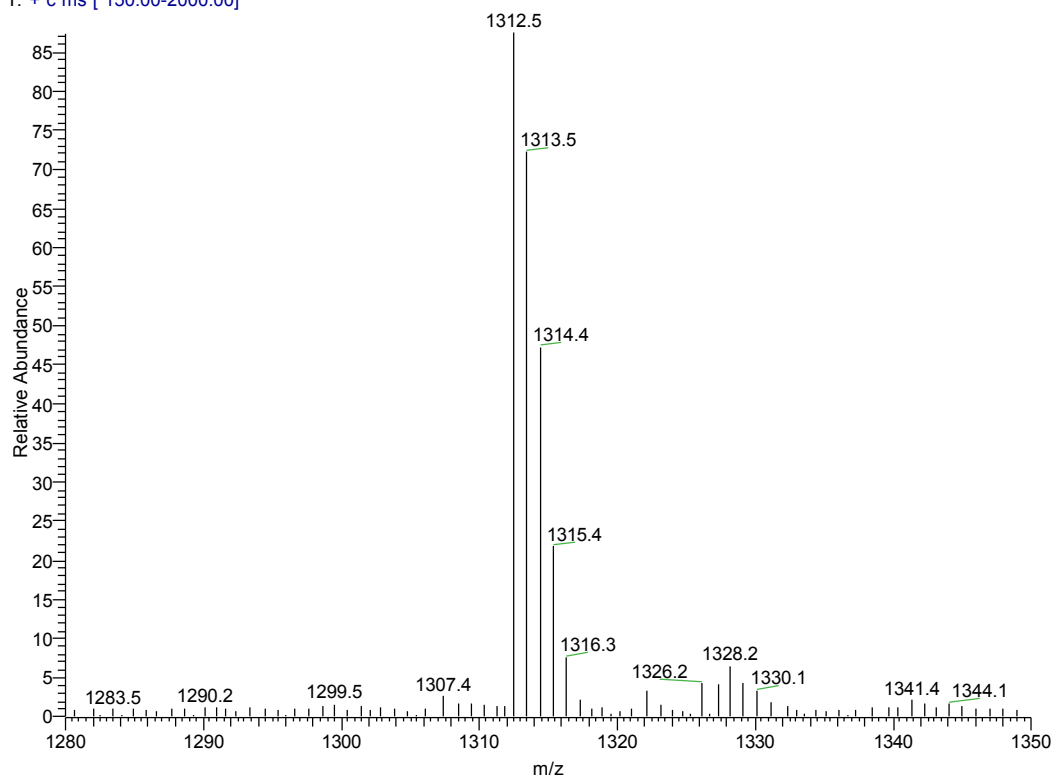

**Fig. 9.** ESI MS spectrum of the pentacyclic tetraacid present as two regioisomers (structures not given).

29#1-20 RT: 0.03-0.96 AV: 20 NL: 1.18E7  
T: + c ms [ 150.00-2000.00]

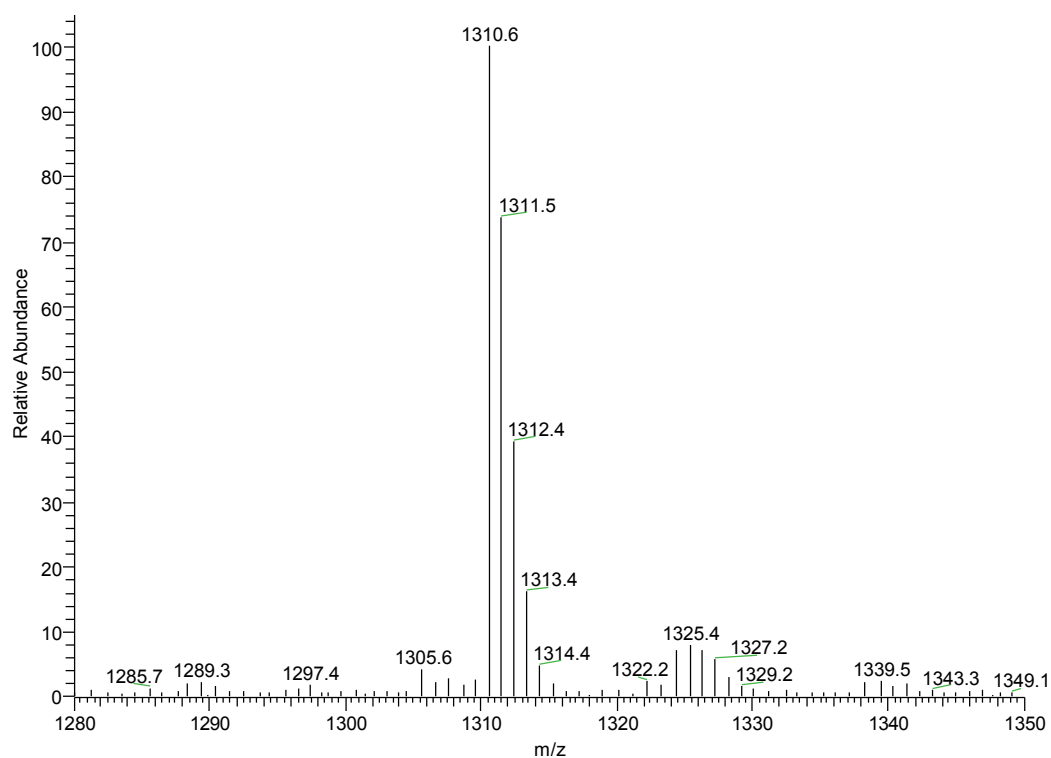

**Fig. 10.** ESI MS spectrum of the of the hexacyclic tetracid (2, 5-7).

32#1-21 RT: 0.01-1.00 AV: 21 NL: 7.11E6  
T: + c ms [ 150.00-2000.00]

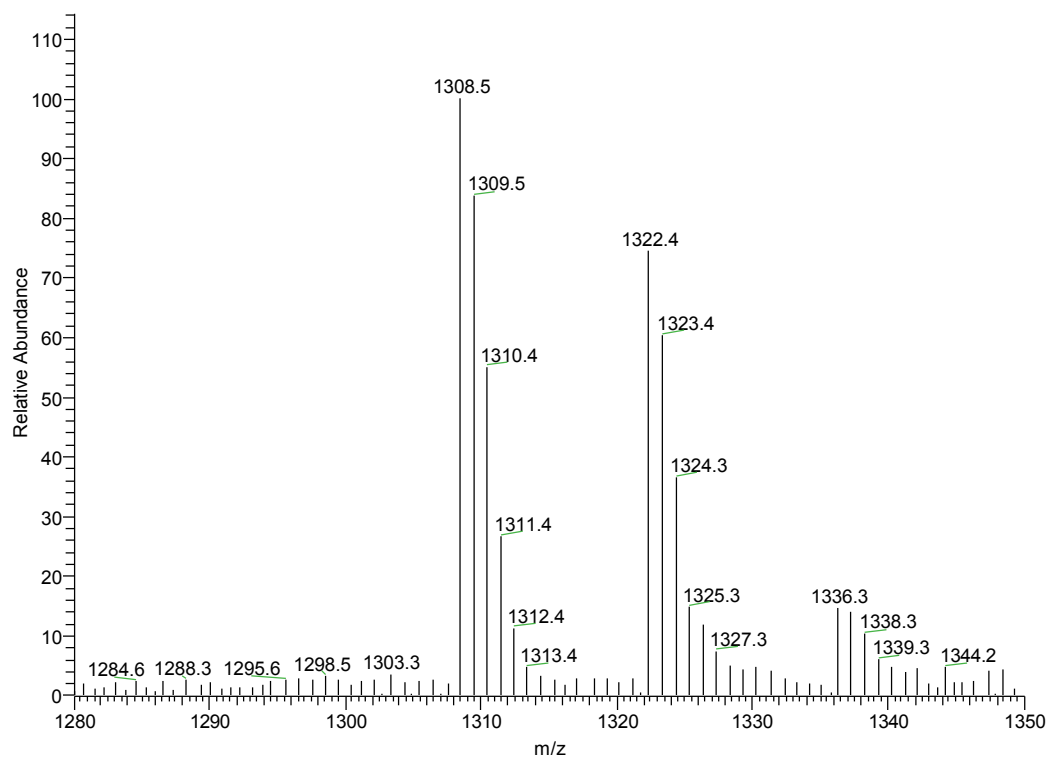

**Fig. 11.** ESI MS spectrum of the mixture of C<sub>80</sub>, C<sub>81</sub> and C<sub>82</sub> heptacyclic tetracids (structures not given).

35#1-21 RT: 0.00-0.99 AV: 21 NL: 5.80E6  
T: + c ms [ 150.00-2000.00]

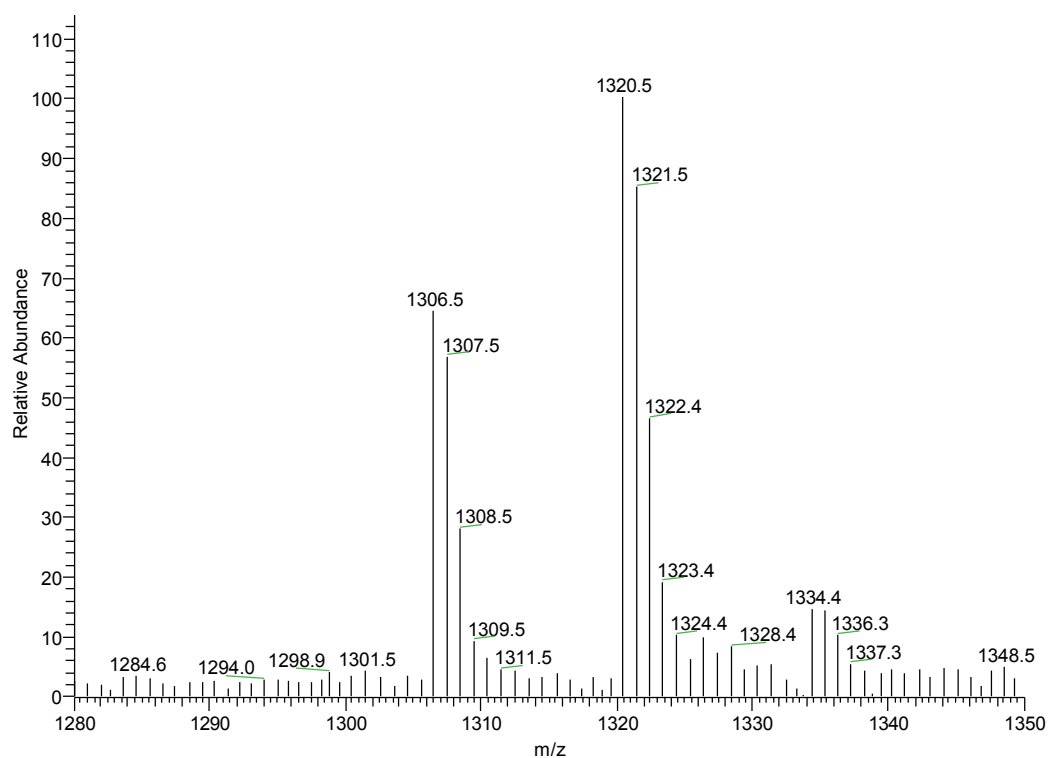

**Fig. 12.** ESI MS spectrum of the mixture of C<sub>80</sub>, C<sub>81</sub> and C<sub>82</sub> octacyclic tetraacids (**4**, **8**, **9**).

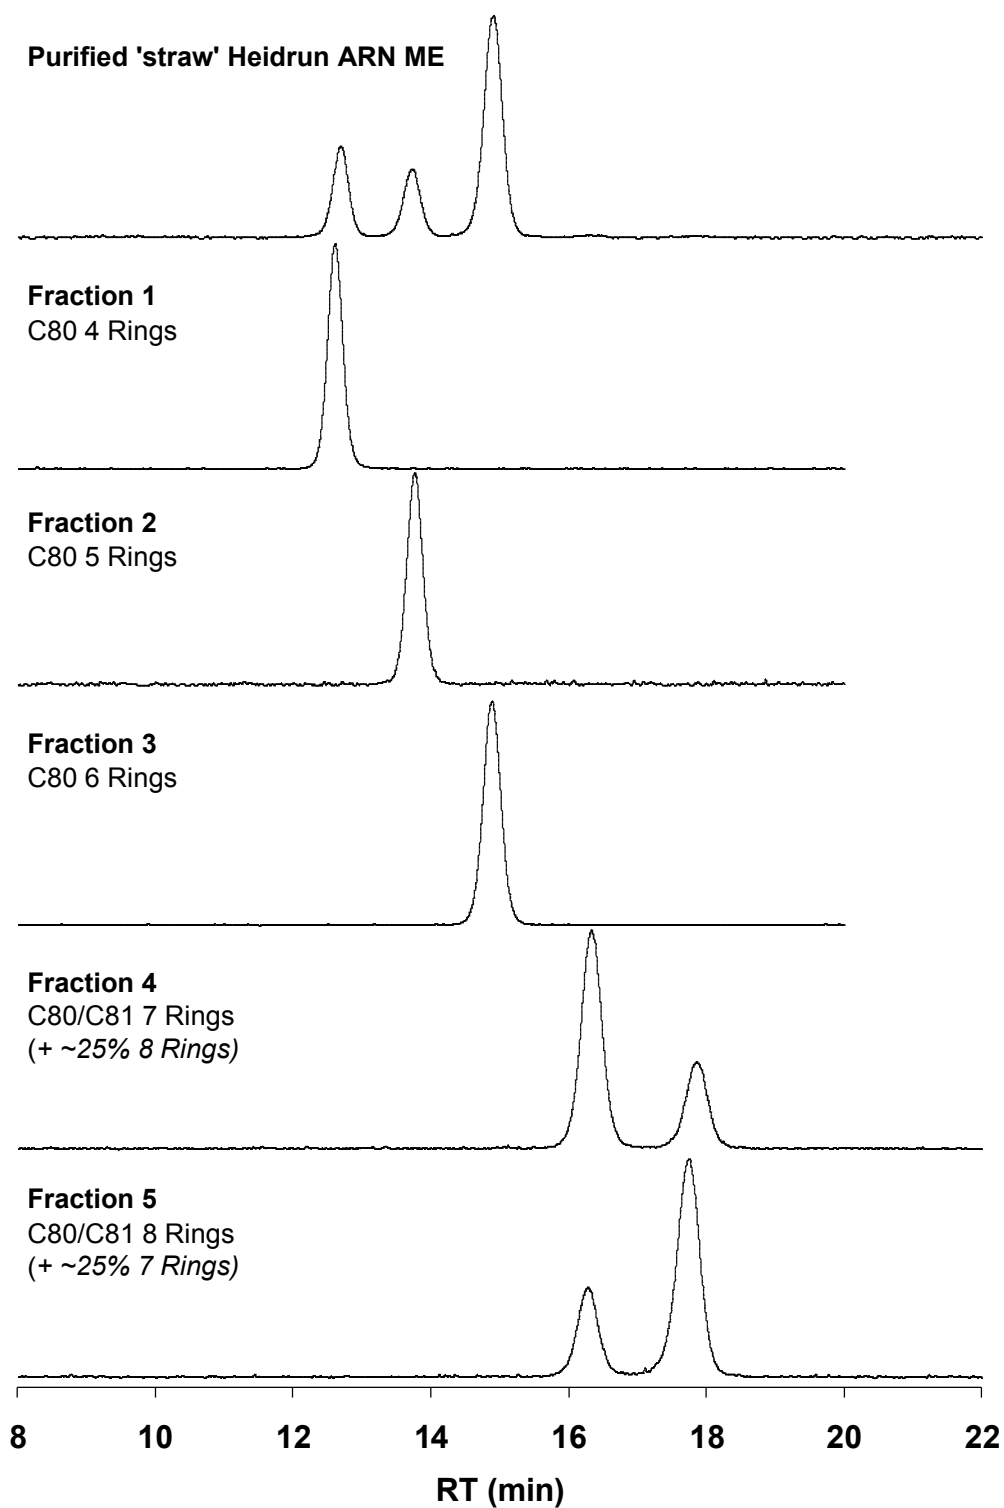

Fig. 13. HPLC-ELSD chromatograms of the mixture of tetraacids isolated from naphthenate deposits, and of the individual fractions analysed by NMR and MS spectroscopy. Experimental details are given in Ref 8.



**Table 1** NMR data (800 MHz, CDCl<sub>3</sub>, 298 K) for hexacyclic C<sub>80</sub> isoprenoid tetraacid tetramethyl esters with 4 rings (**3**), 8 rings (**4**) and 6 rings (**2**, **5-7**), and for the 8-ring C<sub>82</sub> analogue with extra methyl groups at C-13/C-13'.

| Carbon # | Tetracyclic ( <b>3</b> ) |                      | Octacyclic ( <b>4</b> ) |                      | Hexacyclic ( <b>2</b> , <b>5-7</b> ) <sup>a</sup> |                      | Octacyclic C <sub>82</sub> ( <b>9</b> ) <sup>b</sup> |                      |
|----------|--------------------------|----------------------|-------------------------|----------------------|---------------------------------------------------|----------------------|------------------------------------------------------|----------------------|
|          | δ <sub>C</sub> (ppm)     | δ <sub>H</sub> (ppm) | δ <sub>C</sub> (ppm)    | δ <sub>H</sub> (ppm) | δ <sub>C</sub> (ppm)                              | δ <sub>H</sub> (ppm) | δ <sub>C</sub> (ppm)                                 | δ <sub>H</sub> (ppm) |
| 1        | 173.85 <sup>c</sup>      |                      | 173.87 <sup>c</sup>     |                      | 173.9                                             | 173.9                |                                                      |                      |
| 1'       |                          |                      |                         |                      |                                                   |                      |                                                      |                      |
| 2        | 41.69                    | 2.11/2.31            | 40.52                   | 2.32                 | 41.69                                             | 41.69                | 2.32/2.12                                            |                      |
| 2'       |                          |                      |                         |                      | 40.52                                             | 40.52                | 2.33                                                 |                      |
| 3        | 30.36                    | 1.95                 | 36.41                   | 2.23                 | 30.36                                             | 30.36                | 1.95                                                 |                      |
| 3'       |                          |                      |                         |                      | 36.41                                             | 36.41                | 2.23                                                 |                      |
| 4        | 36.95                    | 1.18/1.30            | 31.52                   | 1.23/1.82            | 36.95                                             | 36.95                | 1.18/1.30                                            |                      |
| 4'       |                          |                      |                         |                      | 31.52                                             | 31.52                | 1.23/1.82                                            |                      |
| 5        | 25.867                   | 1.26/1.30            | 30.34                   | 1.25/1.75            | 25.873                                            | 25.867               | 1.26/1.31                                            |                      |
| 5'       | 25.871                   |                      |                         |                      | 30.33                                             | 30.33                | 1.25/1.75                                            |                      |
| 6        | 36.94                    | 1.25/1.25            | 46.344                  | 1.67                 | 36.95                                             | 36.95                | 1.26/1.26                                            |                      |
| 6'       |                          |                      | 46.351                  |                      | 46.346                                            | 46.352               | 1.67                                                 |                      |
| 7        | 39.00                    | 1.79                 | 45.511                  | 1.63                 | 39.01                                             | 39.01                | 1.80                                                 |                      |
| 7'       |                          |                      | 45.517                  |                      | 45.512                                            | 45.518               | 1.63                                                 |                      |
| 8        | 33.322                   | 1.05/1.79            | 32.495                  | 1.10/1.75            | 33.322                                            | 33.315               | 1.05/1.79                                            |                      |
| 8'       | 33.315                   |                      | 32.505                  |                      | 32.497                                            | 32.507               | 1.10/1.75                                            |                      |
| 9        | 31.274                   | 1.12/1.75            | 31.43                   | 1.10/1.74            | 31.283                                            | 31.276               | 1.12/1.75                                            |                      |
| 9'       | 31.281                   |                      |                         |                      | 31.43                                             | 31.43                | 1.10/1.74                                            |                      |
| 10       | 44.888                   | 1.67                 | 45.094                  | 1.66                 | 44.887                                            | 44.847               | 1.67                                                 | 45.03                |
| 10'      | 44.847                   |                      | 45.127                  |                      | 45.093                                            | 45.127               | 1.66                                                 |                      |
| 11       | 38.268                   | 1.23                 | 38.264                  | 1.22                 | 38.269                                            | 38.300               | 1.23                                                 | 35.14                |
| 11'      | 38.298                   |                      | 38.300                  |                      | 38.300                                            | 38.264               |                                                      | 1.37                 |
| 12       | 35.73                    | 1.02/1.38            | 35.676                  | 1.01/1.37            | 35.798                                            | 35.730               | 1.03/1.36                                            | 44.46                |
|          |                          |                      |                         |                      |                                                   |                      | 1.02/1.36                                            | 0.90/1.24            |
| 12'      | 35.80                    | 1.03/1.36            | 35.738                  | 1.02/1.36            | 35.674                                            | 35.739               | 1.01/1.37                                            |                      |
| 13       | 24.09                    | 1.17/1.32            | 24.09                   | 1.16/1.31            | 24.091                                            | 24.076               | 1.17/1.32                                            | 27.71                |
| 13'      | 24.42                    | 1.15/1.38            | 24.41                   | 1.14/1.37            | 24.414                                            | 24.421               | 1.15/1.37                                            | 1.53                 |
| 14       | 34.17                    | 1.18/1.21            | 34.16                   | 1.18/1.20            | 34.173                                            | 34.159               | 1.18/1.21                                            | 41.33                |
| 14'      | 37.52                    | 1.06/1.28            | 37.51                   | 1.06/1.28            | 37.517                                            | 37.526               | 1.03/1.28                                            | 0.87/1.20            |
| 15       | 37.96                    | 1.22                 | 37.94                   | 1.21                 | 37.946                                            | 37.938               | 1.22                                                 | 35.19                |
| 15'      | 33.21                    | 1.34                 | 33.19                   | 1.34                 | 33.194                                            | 33.202               | 1.34                                                 | 1.32                 |
| 16       | 30.74                    | 1.21/1.23            | 30.73                   | 1.21/1.23            | 30.73                                             | 30.73                | 1.20/1.23                                            |                      |
| 16'      | 33.79                    | 1.06/1.25            | 33.77                   | 1.06/1.25            | 33.773                                            | 33.787               | 1.06/1.25                                            |                      |
| 17       | 19.72                    | 0.94                 | 39.13                   | 0.77/1.96            | 19.72                                             | 19.72                | 0.94                                                 |                      |
| 17'      |                          |                      |                         |                      | 39.120                                            | 39.128               | 0.78/1.96                                            |                      |
| 18       | 36.004                   | 1.30/1.40            | 34.704                  | 1.37/1.37            | 36.031                                            | 36.005               | 1.30/1.40                                            |                      |
| 18'      | 36.030                   |                      | 34.683                  |                      | 34.684                                            | 34.703               | 1.37/1.37                                            |                      |
| 19       | 17.754                   | 0.84                 | 17.723                  | 0.84                 | 17.748                                            | 17.755               | 0.84                                                 | 17.85                |
| 19'      | 17.748                   |                      | 17.731                  |                      | 17.732                                            | 17.724               |                                                      | 0.83                 |
| 20       | 30.16                    | 1.19                 | 30.16                   | 1.19                 | 30.15                                             | 30.15                | 1.19                                                 |                      |
| 20'      | 19.89                    | 0.86                 | 19.89                   | 0.86                 | 19.89                                             | 19.89                | 0.86                                                 |                      |
| 13-Me    |                          |                      |                         |                      |                                                   |                      |                                                      | 21.33                |
| OMe      | 51.35                    | 3.673                | 51.36                   | 3.667                | 51.346                                            | 51.363               | 3.67                                                 | 0.84                 |

<sup>a</sup> Left <sup>13</sup>C column gives chemical shifts for the major set of signals due to cyclopentyl moiety close to bridge, as in **5**; right <sup>13</sup>C column gives chemical shifts for the minor set of signals due to bicyclopentyl moiety close to the bridge as in **2**.

<sup>b</sup> Only shift data for positions with significant changes in chemical shifts compared to **4** are given.

<sup>c</sup> Chemical shifts interchangeable.
